# Supplementary material
Source: PubMed Central journal article supplement (PMC4840457)
Supplement: 4bc7923855d72643d8e663f84eab61cb_brain-2014-01407-File014.pdf [file 4bc7923855d72643d8e663f84eab61cb_brain-2014-01407-File014.pdf]

Supplemental Figure 1. The task specific regions active during successful Go trials in all groups included the executive network - bilateral dorsal cingulate, inferior parietal lobule, medial dorsal thalamus, and dorso-lateral prefrontal cortex
